# Supplementary material
Source: PubMed Central journal article supplement (PMC2518902)
Supplement: blood-2008-01-135186_1.pdf [file blood-2008-01-135186_1.pdf]

| <b>Primer</b>  | <b>Annealing temp (°C)*</b> | <b>Sequence</b>                                     |
|----------------|-----------------------------|-----------------------------------------------------|
| mNpm1f         | 62                          | tctgctcagaaatgagggcact                              |
| mNpm1r         | 62                          | tagggctgaccacaggctgag                               |
| mKitex8f1      | 63                          | cctctgggtgtctccttagcttc                             |
| mKitex8r1      | 63                          | gtcactcagcaatcattttcagc                             |
| mKitex17f1     | 63                          | gagagctgaaatgaatggctgtg                             |
| mKitex17r1     | 63                          | gataccaaagcacctgggtagac                             |
| mFlt3ex14f1    | 63                          | aaggtaaaaaccggtggcgaag                              |
| mFlt3ex15r1    | 63                          | aataatgcagagggcagaagaagg                            |
| mFlt3ex20f1    | 64.5                        | cagcctaaagaagtgaagcactgg                            |
| mFlt3ex19r1    | 64.5                        | cagtgttctcgggatgtatgacag                            |
| mNRasex2f1     | 63                          | cactcatctgcaaggaatgctatg                            |
| mNRasex2r1     | 63                          | tcgcctacaatcttttcctgtg                              |
| mNRasex3f1     | 60.6- 65.1                  | gfttagcgggtgagggtaaatcac                            |
| mNRasex3r1     | 60.6- 65.1                  | tgttgcaactgttctggcctccac                            |
| mKRasex2f1     | 60.6- 63                    | cattccttgagagccattagctg                             |
| mKRasex2r1     | 60.6- 63                    | ttgcacataggttccctaacacc                             |
| mKRasex3f1     | 63                          | cttattggccactgtctgcttgg                             |
| mKRasex3r1     | 63                          | tacaaggccctgggtgcagatag                             |
| mCBLex8f1      | 63                          | tcttgattggaagccagcagtag                             |
| mCBLex8r1      | 63                          | ctctgggatcccttgtcttggc                              |
| rtCBLex5f1     | 63                          | tggaacagccttgctgtaactcac                            |
| rtCBLex9r1     | 63                          | ccttctgctcctgccttaatagg                             |
| p53ex4f1       | 63                          | ctccagaagatatcctgccatcac                            |
| p53ex11r1      | 63                          | ctcagccctgaagtcataagacag                            |
| mRunx1ex2f1    | 63                          | agcatggtggaggtactagctgac                            |
| mRunx1ex7r1    | 63                          | agatggacggcagagtagggaac                             |
| nras5bamhif1   | 63                          | gacggatccatgactgagtacaaactgggtgggtggagcaggtggtgtggg |
| nras5bamhif1m1 | 63                          | gacggatccatgactgagtacaaactgggtgggtggagcagatggtgtggg |
| nras3notir1    | 63                          | tgagcggccgctacatcagcacacagggcag                     |
| rtnrasf3       | 63                          | aaggacagttgacacaaagcaagc                            |
| rtnrasr1       | 63                          | agaatagggccctctagatgcatg                            |

\* PCR cycling conditions: 94 °C for 3min, 40 cycles of 94 °C for 30sec, 63 °C (unless otherwise noted) for 30sec and 72 °C for 1min followed by 72 °C for 5min
