# Supplementary material
Source: PubMed Central journal article supplement (PMC2518902)
Supplement: blood-2008-01-135186_2.pdf [file blood-2008-01-135186_2.pdf]

| Primer A    |                          | Primer B    |                          | Reference Sequence | Region analyzed | Template    |
|-------------|--------------------------|-------------|--------------------------|--------------------|-----------------|-------------|
| mRunx1ex2f1 | agcatggtggaggtagctgac    | mRunx1ex7r1 | agatggacggcagagtagggaac  | NM_009821          | 1723-2329       | cDNA        |
| mNpm1f      | tctgctcagaaatgagggcact   | mNpm1r      | tagggctgaccacaggctgag    | NM_008722          | 916-1259        | genomic DNA |
| p53ex4f1    | ctccagaagatatcctgccatcac | p53ex11r1   | ctcagccctgaagtcataagacag | NM_011640          | 625-1778        | cDNA        |
| mCBLex8f1   | tcttgattggaagccagcagtag  | mCBLex8r1   | ctctgggatcccttctcttctg   | NM_007619          | 1246-1380       | genomic DNA |
| mKitex8f1   | cctctgggtgtctccttagcttc  | mKitex8r1   | gtcactcagcaatcattttcagc  | NM_021099          | 1269-1386       | genomic DNA |
| mKitex17f1  | gagagctgaaatgaatggctgtg  | mKitex17r1  | gataccaaagcaccctgggtagac | NM_021099          | 2384-2507       | genomic DNA |
| mFlt3ex14f1 | aaggtaaaaaccggtggcgaag   | mFlt3ex15r1 | aataatgcagagggcagaagaagg | NM_010229          | 1929-2169       | genomic DNA |
| mFlt3ex20f1 | cagcctaaagaagtgaagcactgg | mFlt3ex19r1 | cagtgtctcgggatgtatgacag  | NM_010229          | 2651-2775       | genomic DNA |
| mNRasex2f1  | cactcatctgcaaggaatgctatg | mNRasex2r1  | tcgcctacaatcttttcttctg   | NM_010937          | 155-285         | genomic DNA |
| mNRasex3f1  | gtagcgggttgagggtaaatcac  | mNRasex3r1  | tggtgcactgttctgcctccac   | NM_010937          | 286-464         | genomic DNA |
| mKRasex2f1  | cattccttgagagccattagctg  | mKRasex2r1  | ttgcacctatggttcctaacc    | NM_021284          | 182-306         | genomic DNA |
| mKRasex3f1  | cttattggccactgtctgcttgg  | mKRasex3r1  | tacaaaggccctgggtcagatag  | NM_021284          | 307-484         | genomic DNA |
